# Supplementary material for: Loading Co3N nanoparticles as efficient cocatalysts over Zn0.5Cd0.5S for enhanced H2 evolution under visible light
Source: Royal Society of Chemistry journal article supplement (doi:10.1039/c8dt05087b), 2019-01-01
Supplement: c8dt05087b1.pdf [file c8dt05087b1.pdf]

### Supporting Information

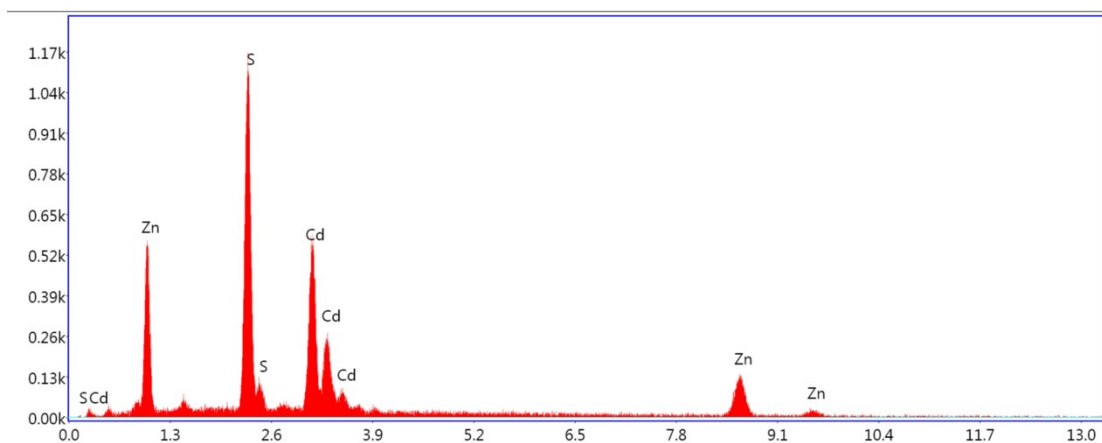

Fig. S1 EDX data of sample ZCS-2.

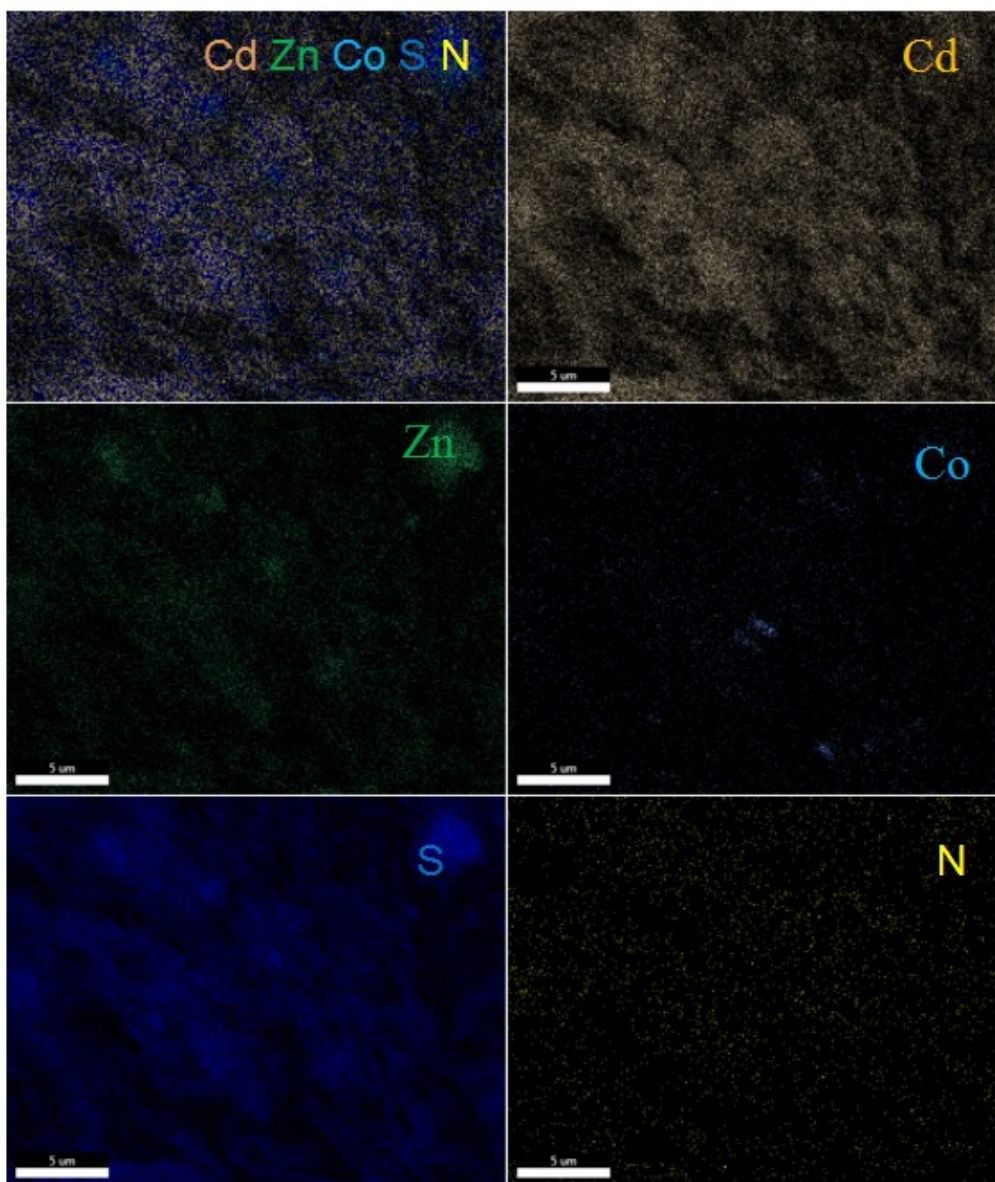

Fig. S2 SEM-Mapping images for cadmium, zinc, sulphur, cobalt, nitrogen.

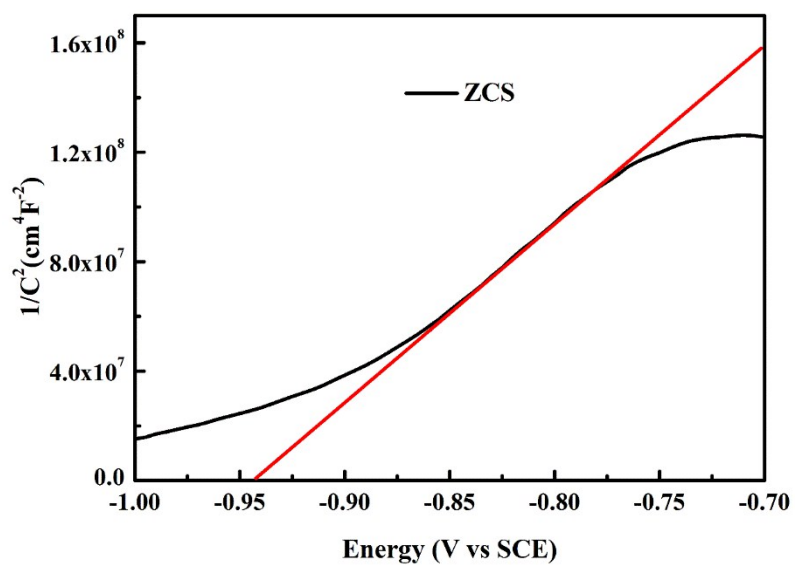

**Fig S3.** Mott-Schottky plot of ZCS.

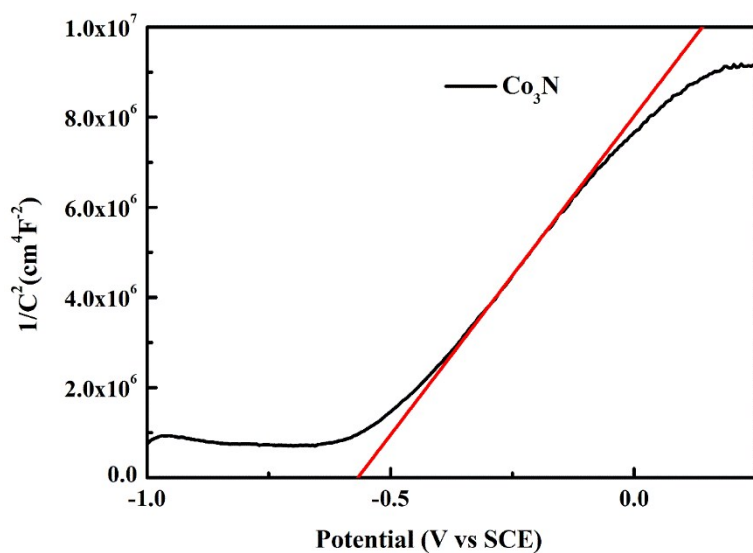

**Fig S4.** Mott-Schottky plot of Co<sub>3</sub>N.

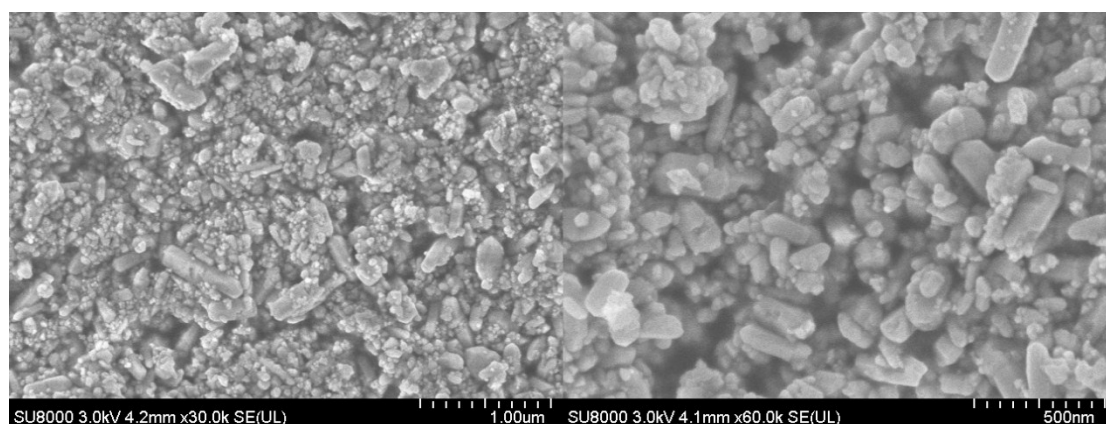

**Fig. S5.** SEM images of ZCS-2 after long-term photocatalytic production of H<sub>2</sub> for 15 h.

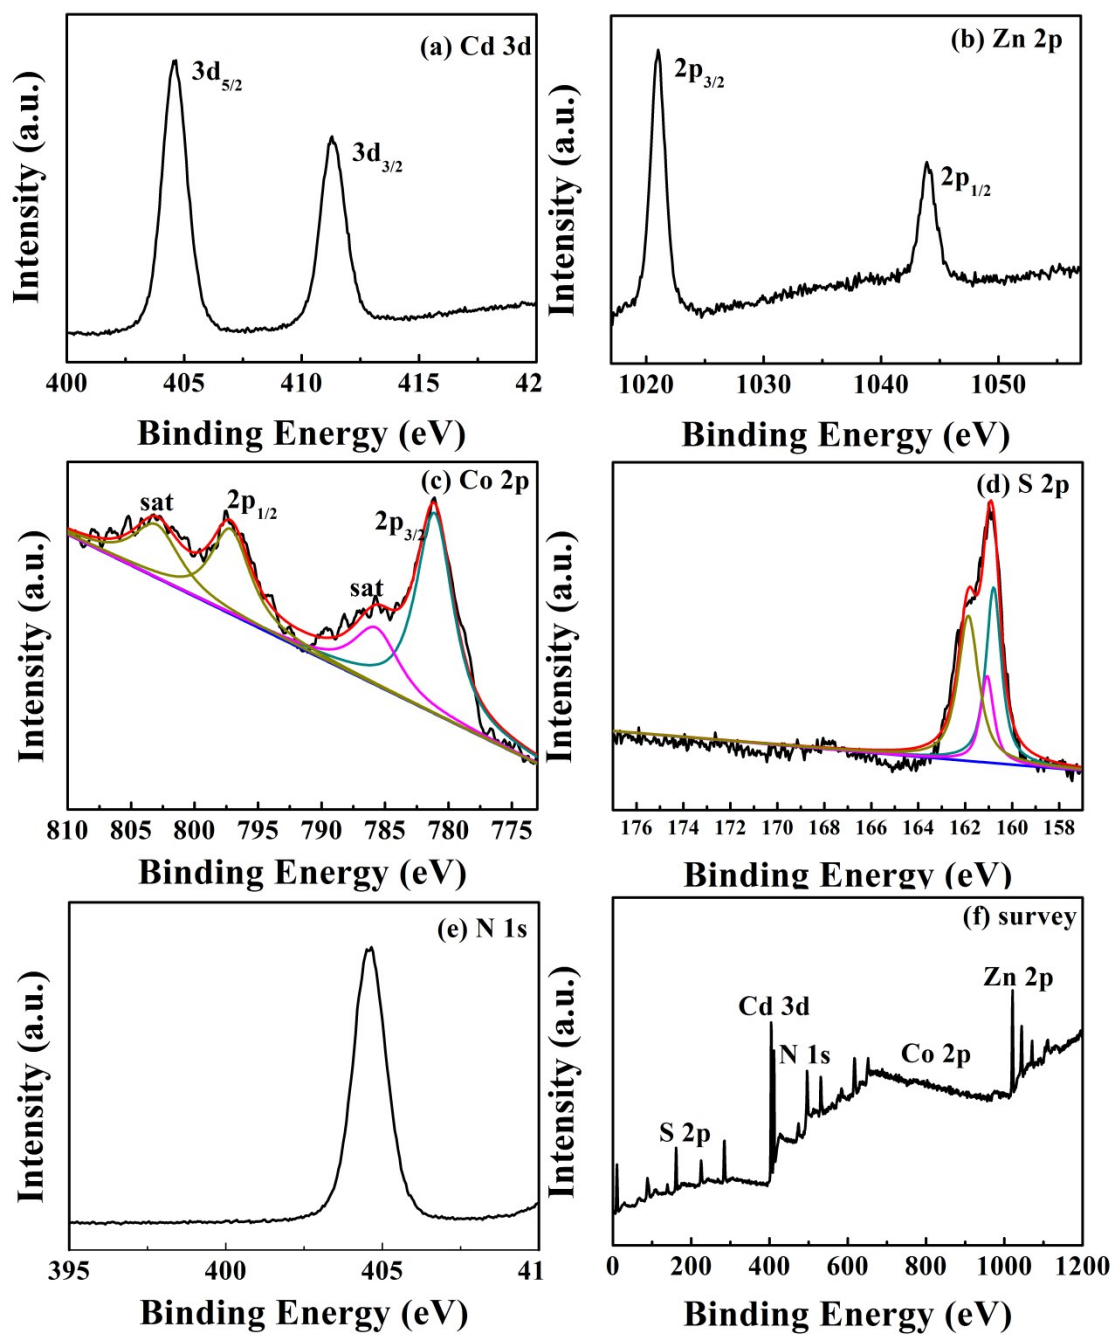

**Fig. S6.** XPS spectra of ZCS-2 after long-term photocatalytic production of H<sub>2</sub> for 15 h: (a) Cd 3d; (b) Zn 2p; (c) Co 2p; (d) S 2p; (e) N 1s; (f) survey.

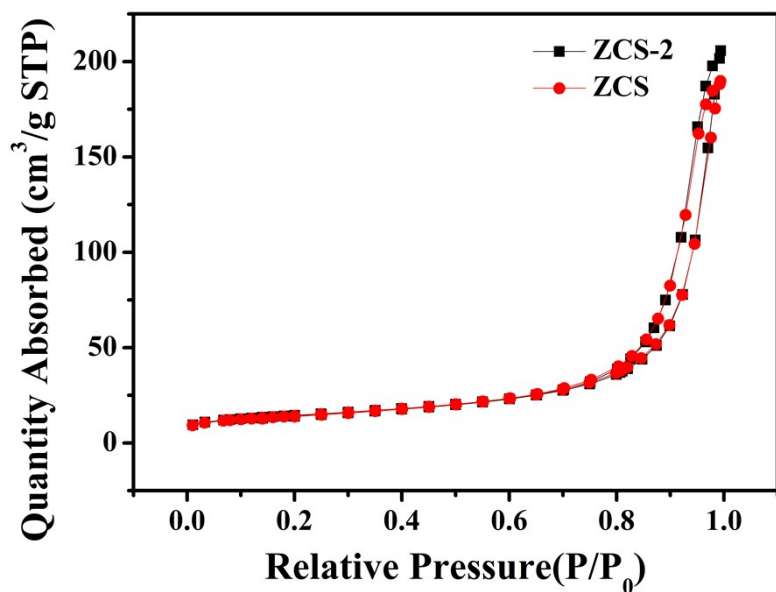

(a)

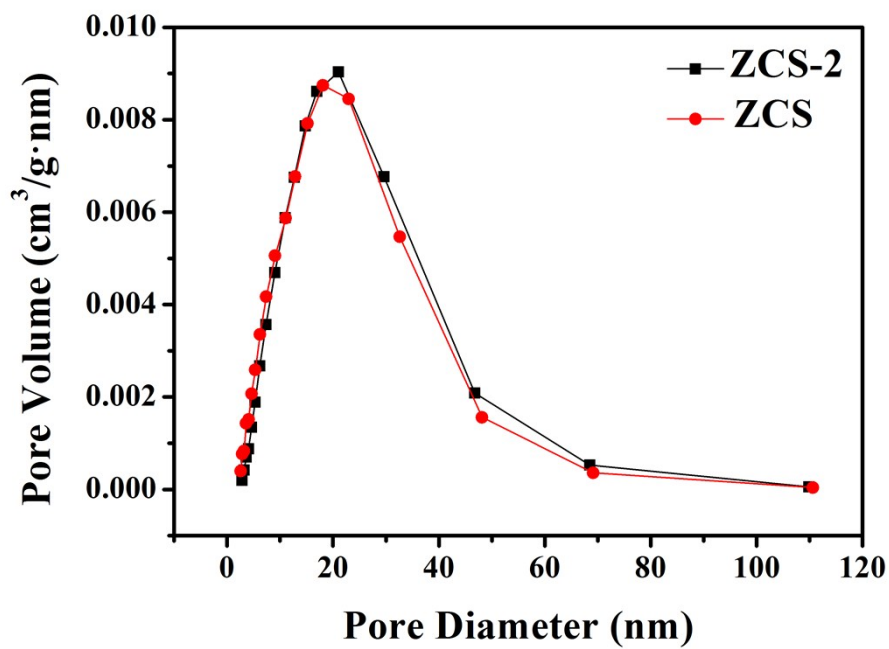

(b)

**Fig. S7.** Nitrogen adsorption-desorption isotherms (a) and the corresponding pore-size distribution curves (b) of ZCS and ZCS-2.

**Table S1** BET surface area and the pore size of ZCS and ZCS-2.

| Sample | BET surface area (m <sup>2</sup> /g) | BJH pore diameter (nm) |
|--------|--------------------------------------|------------------------|
| ZCS    | 49.25                                | 19.60                  |
| ZCS-2  | 49.74                                | 21.26                  |

**Table S2.** The weight percentage of Co<sub>3</sub>N loading on ZCS by ICP measurements.

|               | ZCS-0.5 | ZCS-1   | ZCS-1.5 | ZCS-2   | ZCS-3   | ZCS-5   |
|---------------|---------|---------|---------|---------|---------|---------|
| Theory values | 0.5wt%  | 1wt%    | 1.5wt%  | 2wt%    | 3wt%    | 5wt%    |
| ICP values    | 0.46wt% | 0.93wt% | 1.45wt% | 1.96wt% | 2.87wt% | 4.89wt% |

**Table S3.** Photocatalytic H<sub>2</sub> evolution activity over different ZCS photocatalysts.

| Photocatalyst | Amount | Activity (value | Activity | A.Q.Y.(%) | Reference |
|---------------|--------|-----------------|----------|-----------|-----------|
|---------------|--------|-----------------|----------|-----------|-----------|

|                                                                                     | of catalyst (mg) | reported in literature, $\mu\text{mol}\cdot\text{h}^{-1}$ | ( $\times 1000$ $\mu\text{mol h}^{-1} \text{g}^{-1}$ ) |       |           |
|-------------------------------------------------------------------------------------|------------------|-----------------------------------------------------------|--------------------------------------------------------|-------|-----------|
| $\text{Co}_3\text{N}/\text{Zn}_{0.5}\text{Cd}_{0.5}\text{S}$                        | 1                | 218.8                                                     | 218.8                                                  | 30.2  | This work |
| $\text{TiO}_2/\text{Zn}_{0.5}\text{Cd}_{0.5}\text{S}$                               | 200              | 2640                                                      | 13.2                                                   | 38.1  | 1         |
| $\text{Ni}_2\text{P}/\text{Zn}_{0.5}\text{Cd}_{0.5}\text{S}$                        | ---              | 65.6                                                      | ---                                                    | 29    | 2         |
| $\text{rGO}/\text{C}_3\text{N}_4/\text{Zn}_{0.5}\text{Cd}_{0.5}\text{S}$            | 100              | 3924                                                      | 39.24                                                  | 37    | 3         |
| $\text{Cu}_{1.94}\text{S}-\text{Zn}_x\text{Cd}_{1-x}\text{S}$                       | 20               | 270.66                                                    | 13.53                                                  | 26.4  | 4         |
| $\text{FeP}/\text{Zn}_x\text{Zd}_{1-x}\text{S}-\text{P}$                            | 10               | 244.5                                                     | 24.45                                                  | 10    | 5         |
| $\text{Pt}/\text{Zn}_x\text{Cd}_{1-x}\text{S}-\text{P}$                             | 10               | 188                                                       | 18.8                                                   | ---   | 5         |
| $\text{NiS}/\text{Zn}_x\text{Cd}_{1-x}\text{S}-\text{MOF}$                          | 50               | 839                                                       | 16.78                                                  | ---   | 6         |
| $\text{Cd}_{0.5}\text{Zn}_{0.5}\text{S}$                                            | 100              | 179                                                       | 1.79                                                   | 43    | 7         |
| $\text{Zn}_{0.5}\text{Cd}_{0.5}\text{S}$<br>porous nanosheets                       | 300              | 500                                                       | 1.667                                                  | ---   | 8         |
| $\text{Cd}_{0.5}\text{Zn}_{0.5}\text{S}$<br>nanorod                                 | 100              | 258                                                       | 2.58                                                   | 62    | 9         |
| $\text{Zn}_{0.5}\text{Cd}_{0.5}\text{S}$                                            | 50               | 371                                                       | 7.42                                                   | 9.6   | 10        |
| $\text{ZnS}/\text{Zn}_{1-x}\text{Cd}_x\text{S}/\text{CdS}$                          | 5                | 532.5                                                     | 106.5                                                  | ---   | 11        |
| $2\%\text{Cu}/\text{Zn}_{0.5}\text{Cd}_{0.5}\text{S}$                               | 100              | 2140                                                      | 21.4                                                   | 18.8  | 12        |
| $\text{Zn}_{0.8}\text{Cd}_{0.2}\text{S}/\text{rGO}$                                 | 50               | 91.2                                                      | 1.82                                                   | 23.4  | 13        |
| 1T-<br>$1\text{Li}_x\text{MoS}_2/\text{Cd}_{0.5}\text{Zn}_{0.5}\text{S}$            | 100              | 769.9                                                     | 7.70                                                   | ---   | 14        |
| $\text{Zn}_{0.5}\text{Cd}_{0.5}\text{S}/\text{PdP}_{\sim 0.33}\text{S}_{\sim 1.67}$ | 1                | 372.12                                                    | 372.12                                                 | 19.7  | 15        |
| $\text{Zn}_{0.5}\text{Cd}_{0.5}\text{S}/\text{CoP}$                                 | 100              | 1217                                                      | 12.17                                                  | 45    | 16        |
| $\text{NiS}_x/\text{Zn}_{0.8}\text{Cd}_{0.2}\text{S}/\text{rGO}$                    | 50               | 392                                                       | 7.84                                                   | 20.88 | 17        |
| $\text{Zn}_{0.5}\text{Cd}_{0.5}\text{S}/\text{CoP}$                                 | 50               | 734                                                       | 14.68                                                  | ---   | 18        |
| $\text{Zn}_{0.5}\text{Cd}_{0.5}\text{S}$                                            | 50               | 971                                                       | 19.42                                                  | ---   | 19        |
| $\text{Cd}_{0.5}\text{Zn}_{0.5}\text{S}/\text{C}_3\text{N}_4$                       | 20               | 668.2                                                     | 33.41                                                  | 46.65 | 20        |

## References

- [1] Y. B. Chen and L.J. Guo, *J. Mater. Chem.*, 2012, **22**, 7507-7514.
- [2] S. Q. Peng, Y. Yang, J. N. Tan, C. Gan and Y. X. Li, *Appl. Surf. Sci.*, 2018, **447**, 822-828.
- [3] W. H. Xue, X. Y. Hu, E. Z. Liu and J. Fan, *Appl. Surf. Sci.*, 2018, **447**, 783-794.
- [4] Y. G. Chen, S. Zhao, X. Wang, Q. Peng, R. Lin, Y. Wang, R.A. Shen, X. Cao, L. B. Zhang, G. Zhou, J. Li, A.D. Xia and Y. D. Li, *J. Am. Chem. Soc.*, 2016, **138**, 4286-4289.
- [5] X. L. Zhu, S. J. Yu, X.Z. Gong and C. Xue, *ChemPlusChem* 2018, **83**, 825–830.
- [6] X. X. Zhao, J.R. Feng, J. Liu, W. Shi, G. M. Yang, G. C. Wang and P. Cheng, *Angew. Chem. Int. Ed.*, 2018, **57**, 9790-9794.
- [7] M. Liu, L. Wang, G. M. Lu, X. Yao and L. Guo, *Energy Environ. Sci.*, 2011, **4**, 1372-1378.
- [8] Y. Yu, J. Zhang, X. Wu, W. Zhao, B. Zhang, *Angew. Chem., Int. Ed.*, 2012, **51**, 897-900.
- [9] M. Liu, D. Jing, Z. Zhou and L. Guo, *Nat. Commun.*, 2013, **4**, 2278.
- [10] Q. Li, H. Meng, P. Zhou, Y. Zheng, J. Wang and J. Yu, J. Gong, *ACS Catal.*, 2013, **3**, 882-889.
- [11] K. Li, R. Chen, S. L. Li, M. Han, S. L. Xie, J. C. Bao, Z. H. Dai and Y. Q. Lan, *Chem. Sci.*, 2015, **6**, 5263-5268.
- [12] Z. Mei, B. Zhang, J. Zheng, S. Yuan, Z. Zhuo, X. Meng, Z. Chen, K. Amine, W. Yang, L. Wang, W. Wang, S. Wang, Q. Gong, J. Li, F. Liu and P. Feng, *Nano Energy*, 2016, **26**, 405-416.
- [13] J. Zhang, J.G. Yu, M. Jaroniec and J. R. Gong, *Nano Lett.*, 2012, **12**, 4584-4589.
- [14] H. Du, H. L. Guo, Y. N. Liu, X. Xie, K. Liang, X. Zhou, X. Wang and A. W. Xu, *ACS Appl. Mater. Inter.*, 2016, **8**, 4023-4030.
- [15] J. Song, H. Zhao, R. Sun, X. Li and D. Sun, *Energy Environ. Sci.*, 2017, **10**, 225-235.
- [16] P. F. Wang, S. H. Zhan, H. T. Wang, Y. G. Xia, Q. L. Hou, Q. X. Zhou, Y. Li and R. R. Kumar, *Appl. Catal. B*, 2018, **230**, 210-219.
- [17] C. Xue, H. Li, H. An, B. L. Yang, J. J. Wei and G. D. Yang, *ACS Catal.*, 2018, **8**, 1532-1545.
- [18] D.S. Dai, H. Xu, L. Ge., C.c. Han, Y.Q. Gao, S.S. Li and Y Lu, *Appl. Catal. B*, 2017, **217**, 429-436.
- [19] C. C. Shen, Y. N. Liu, X. Zhou, H.L. Guo, Z. W. Zhao, K. Liang and A. W. Xu, *Catal. Sci. Technol.*, 2017, **7**, 961-967.
- [20] L. H. Yao, D. Wei, Y. M. Ni, D. P. Yan, C. W. Hu, *Nano Energy*, 2016, **26**, 248-256.
